# Supplementary material
Source: publisher site journal article supplement (https://www.spandidos-publications.com/1497/downloadSupplementary)
Supplement: Supplementary file 1 [file downloadSupplementary]

## Sheet: Sheet 1 - node_table pathway p 
Table SII. Network analysis results.
Id	Label	Degree	Betweenness	Expression
ENSP00000344818	UBC	88	7227.98	0.444852
ENSP00000378699	CDK1	26	322.79	-0.72334
ENSP00000270202	AKT1	23	780.33	-0.405115
ENSP00000266970	CDK2	23	174.83	-0.399077
ENSP00000300093	PLK1	20	357.82	-0.697221
ENSP00000346671	FYN	17	381.13	-0.513132
ENSP00000263025	MAPK3	16	166.7	0.538705
ENSP00000256442	CCNB1	16	71.41	-0.840491
ENSP00000314458	CDC42	14	292.35	0.461552
ENSP00000361423	ABL1	14	150.5	0.390615
ENSP00000367207	MYC	14	148.09	-0.447576
ENSP00000344456	CTNNB1	13	536.9	0.382715
ENSP00000339007	GRB2	13	358.44	0.740608
ENSP00000308450	CDC20	13	158.06	-0.771114
ENSP00000264657	STAT3	12	117.28	0.43578
ENSP00000263754	KAT2B	12	104.88	-0.685456
ENSP00000428924	LYN	11	184.91	-0.575654
ENSP00000228307	PXN	11	159.09	-0.616154
ENSP00000227507	CCND1	11	66.51	-0.796372
ENSP00000418960	BRCA1	11	52.48	-0.511609
ENSP00000320147	EZH2	10	73.63	-0.691119
ENSP00000332973	SMAD3	10	41.01	-0.504339
ENSP00000216911	AURKA	10	23.96	-0.898611
ENSP00000303709	UBE2E1	10	10.17	0.598765
ENSP00000288207	CCNB2	10	5.37	-0.870851
ENSP00000247668	TRAF2	9	357.23	-0.40216
ENSP00000314067	PAK2	9	87.46	-0.565751
ENSP00000274026	CCNA2	9	31.58	-0.930916
ENSP00000331602	PRKCD	9	15.84	0.386783
ENSP00000349960	ACTB	8	56.17	-0.547605
ENSP00000301633	BIRC5	8	29.6	-0.667926
ENSP00000342307	FOXM1	8	23.92	-1.16628
ENSP00000262158	SMAD7	8	18.64	-0.490074
ENSP00000339191	CAV1	7	149.45	0.597308
ENSP00000249071	RAC2	7	68.37	-1.9588
ENSP00000358335	MAP3K7	7	62.84	0.532613
ENSP00000362592	RBBP4	7	56.76	-0.594353
ENSP00000227758	BIRC2	7	51.24	-0.389035
ENSP00000313829	KHDRBS1	7	27.74	-0.395045
ENSP00000343204	JAK1	7	12.25	1.1857
ENSP00000263382	ASF1B	6	148.87	-0.704405
ENSP00000297338	RAD21	6	60.2	-0.717795
ENSP00000352516	DNMT1	6	37.17	-0.402945
ENSP00000251849	RAF1	6	25.13	-0.538339
ENSP00000384863	XPO1	6	16.25	-0.589338
ENSP00000265056	MCM2	6	12.37	-0.756482
ENSP00000263464	BIRC3	6	9.43	-0.409502
ENSP00000321656	CDC25C	6	7.63	-0.506122
ENSP00000300574	CRK	6	5.39	0.486289
ENSP00000157812	PSMC4	6	4.53	1.19299
ENSP00000296122	PPP1CB	5	82.11	-0.394891
ENSP00000303351	ITGB1	5	80.94	0.72815
ENSP00000316029	TLN1	5	43.55	0.662209
ENSP00000364310	H2AFX	5	39.32	-0.590107
ENSP00000260363	KIF23	5	27.13	-0.726175
ENSP00000265354	SRF	5	21.67	0.419446
ENSP00000287598	BUB1B	5	12.33	-0.512823
ENSP00000398495	DIABLO	5	7.98	0.393183
ENSP00000338934	EZR	5	5.47	-1.00341
ENSP00000355249	E2F2	5	2.68	-0.676386
ENSP00000216122	MCM5	5	2.47	-0.716503
ENSP00000224784	ACTA2	4	340.75	0.680506
ENSP00000262982	CSE1L	4	183.54	-0.391168
ENSP00000368884	RPS6KA3	4	176.61	0.379094
ENSP00000279022	MYL9	4	151.3	0.455436
ENSP00000265563	PRKAR2A	4	79.31	0.430479
ENSP00000269321	ARHGDIA	4	21.28	-0.406501
ENSP00000232458	ECT2	4	9.87	-0.777993
ENSP00000341268	TRADD	4	9.17	0.417093
ENSP00000348215	SH3PXD2A	4	8.94	0.73644
ENSP00000246792	RRAS	4	4.94	0.603295
ENSP00000275517	CDCA5	4	3.71	-1.0089
ENSP00000346839	FN1	4	3.53	0.427355
ENSP00000365439	HNRNPK	4	2.38	0.692728
ENSP00000218089	STAG2	4	1.48	-0.483886
ENSP00000316578	SUZ12	4	0.84	-0.477682
ENSP00000222139	EPOR	4	0.31	-0.443387
ENSP00000265165	LEF1	4	0	-0.634723
ENSP00000305255	STX8	3	341	-0.621345
ENSP00000400717	GNA13	3	279.11	-0.524182
ENSP00000313681	SPHK1	3	140.24	-0.634842
ENSP00000222812	STX1A	3	140	-0.670513
ENSP00000276431	TNFRSF10B	3	140	-0.79416
ENSP00000365576	UBQLN1	3	70	-0.415352
ENSP00000336927	ALDOA	3	33.13	1.84738
ENSP00000365851	BMI1	3	23.53	-0.753405
ENSP00000239938	EGR1	3	17.83	-0.600568
ENSP00000363435	ITPR3	3	7.12	0.437542
ENSP00000351446	WDR5	3	5.33	-0.428611
ENSP00000381293	NSF	3	3.5	0.393675
ENSP00000257745	KMT2E	3	1.71	0.410788
ENSP00000295598	ATP1A1	3	1.11	1.16955
ENSP00000279247	CAPN1	3	0.85	0.635854
ENSP00000410452	STMN1	3	0.65	-1.67141
ENSP00000260810	TOPBP1	3	0.64	-0.417007
ENSP00000377192	G6PD	3	0.5	0.392996
ENSP00000223641	SEC61B	2	140	-1.21006
ENSP00000350878	S1PR3	2	140	-0.41412
ENSP00000377015	PICALM	2	140	0.396958
ENSP00000351410	PRKAR1A	2	60.95	-1.36073
ENSP00000253778	GFPT2	2	41.43	0.642436
ENSP00000440045	ATP2A2	2	24.67	0.491318
ENSP00000322909	FHL2	2	7.23	-0.379126
ENSP00000245414	IRF1	2	5.35	0.580341
ENSP00000294066	MAP4K2	2	4.22	0.487432
ENSP00000264705	CAD	2	0.59	-0.402852
ENSP00000233057	EIF2AK2	2	0.5	-0.46278
ENSP00000260600	ADCY3	2	0.5	-0.535702
ENSP00000226253	ALDOC	2	0	0.778501
ENSP00000267996	TPM1	2	0	0.443063
ENSP00000270776	PGD	2	0	0.586593
ENSP00000271555	MEF2D	2	0	0.644395
ENSP00000286371	ATP1B3	2	0	0.861568
ENSP00000318697	TUBB6	2	0	1.26779
ENSP00000345083	MAP2K3	2	0	0.435473
ENSP00000360124	PGM1	2	0	-0.902707
ENSP00000378368	FLOT2	2	0	0.472265
ENSP00000467024	RAD23A	2	0	-0.544423
ENSP00000078429	GNA11	1	0	-0.700832
ENSP00000216117	HMOX1	1	0	0.847614
ENSP00000222254	PIK3R2	1	0	0.463483
ENSP00000238994	PPP1R3C	1	0	0.551816
ENSP00000251047	LMAN1	1	0	0.52135
ENSP00000254976	SNAP25	1	0	0.513405
ENSP00000263433	PPP1R12C	1	0	-0.48369
ENSP00000264498	FGF2	1	0	0.571244
ENSP00000272227	PDIA6	1	0	0.804816
ENSP00000274140	Mar-06	1	0	-0.542461
ENSP00000280551	SEC24D	1	0	-0.462164
ENSP00000286548	GNAQ	1	0	0.489689
ENSP00000295702	SSR2	1	0	0.541434
ENSP00000307305	DDIT4	1	0	1.47371
ENSP00000308413	RPS6KB2	1	0	0.512934
ENSP00000318822	BID	1	0	0.438494
ENSP00000349547	RASSF1	1	0	-0.511822
ENSP00000369081	TXNDC5	1	0	-0.826859
ENSP00000411099	TLK1	1	0	-1.19906
ENSP00000409555	HERPUD1	1	0	0.712294
ENSP00000345492	SH2B3	1	0	-0.460674
ENSP00000415430	GTSE1	1	0	-0.686721
ENSP00000344223	MBTPS1	1	0	-0.509291
ENSP00000416293	SLC2A1	1	0	0.820251
node_table pathway P<0.05 and TLK1.
